# Supplementary material for: TAF-4 is required for the life extension of isp-1, clk-1 and tpk-1 Mit mutants
Source: Aging (Albany NY). 2013 Oct 4;5(10):741–58. doi: 10.18632/aging.100604 (PMC3838777; doi:10.18632/aging.100604)
Supplement: Supplementary file 2 [file aging-05-741-s002.xlsx]

## Sheet: F1 Phenotypes of Final Hits
	F1 Phenotypes
	RNAi Target*	CL2166, F1 (+3 days from egg)	TJ564, F1 (+4 days from egg)	TJ564, F1 (+7 days from egg)
	Vector (A4)	Healthy GA, many eggs.	Slow-moving, pale L3s, medium-high GFP induction.	Healthy, slow-moving, gravid adults. Not as robust as Well # B4.
	Vector (B4)	Healthy GA, many eggs.	Most L4, strong GFP induction.	Many F2 eggs and progeny present.
	aha-1	Vector-like.	Retarded development, skinny.	Slight fertility decrease, mild GFP induction.
	ceh-18	Retarded development, fewer eggs, fewer hatchlings compared to vector.	Sick L1s, very slow developing.	All F1 adults dead, possible L2 arrest of F2.
	ceh-24	Fewer eggs, generally slower	Vector-like.	Medium-strong GFP induction (most worms).
	daf-2	Most vector-like, some developmental retardation, slighlty fewer eggs.	Asynchronous development (L3-Adult mix).	Infertile.
	dpr-1	~ 50% fewer eggs, weak/medium GFP induction.	Very mild developmental asynchrony, mostly vector-like.	Reduced average fertility.
	elt-3	Weak GFP suppression, except in juxtapharangeal intestinal cells where elevated.	Medium GFP suppression.	Medium GFP suppression.
	F28H6.2	Many appear sick, some arrest, fewer eggs, some have bright GFP head spot.	Vector-like.	Vector-like.
	F42F12.3 ( not med-1)	Vector-like.	Vector-like (A4).	Vector-like.
	hif-1	Weak GFP induction.	Retarded development, skinny (potentially sick), weak GFP induction.	Reduced F1 fertility, medium GFP induction.
	hoxB2**	Vector-like.	Vector-like (B4).	Gonad-specific GFP induction.
	jun-1	Vector-like.	Asynchronous development (L1-L3 mix), some clearly sick.	F1 adults sick (some dead), severe F1 infertility.
	ketn-1 (not nhr-198)**	Vector-like.	Advanced development, many egg-laying adults.	F2 older than vector F2, gonad-specific GFP induction.
	nhr-105	Medium GFP suppression	Healthy-looking L4, medium-strong GFP suppression.	Slight developmental retardation, strong GFP suppression.
	nhr-125	Weak GFP induction.	Some worms have retarded development and seem sick.	Mix of weak GFP induction and weak GFP suppression.
	nhr-209**	Vector-like	L2 arrest, moving but appear sick.	Retarded development, few F2 progeny probably due to slowed development.
	nhr-213	Vector-like.	Vector-like (B4)	Vector-like.
	nhr-214	Vector-like.	Retarded development, skinny young L3.	F1 fecundity normal but obvious fertility defect.
	nhr-27	Slightly fewer progeny, GFP weak induction	Vector-like (A4).	Weak-medium GFP induction.
	nhr-280	Vector-like.	Vector-like (B4).	Vector-like.
	nhr-49	Pale and frail-looking L3-YA (eventually laid 1-2 days later, severely reduced progeny number), complete GFP suppression.	Developmental delay, medium GFP suppression.	Reduced fecundity and fertility, medium GFP suppression.
	nhr-7**	Fewer eggs, generally slower	Some worms show strong GFP induction.	Medium-strong GFP induction (most worms).
	taf-4	Only one gravid animal (most eggs placed on lawn never hatched), GFP medium induction.	All eggs placed on lawn never hatched.	-
	tbx-2	Not all reached adulthood, weak/medium GFP suppression.	Retarded development, young L3, medium GFP suppression.	Retarded development, medium GFP suppression.
	Y62E10A.17	Vector-like.	Half of eggs placed on lawn never hatched, those that did had slight developmental acceleration.	Reduced fecundity and fertility.
	* Genes in red indicate clones selected for Po lifespan studies
	** Described phenotypes were not robust across experiementer
